# Supplementary material for: A microwave-assisted synthesis of CoO@Co core–shell structures coupled with N-doped reduced graphene oxide used as a superior multi-functional electrocatalyst for hydrogen evolution, oxygen reduction and oxygen evolution reactions
Source: Royal Society of Chemistry journal article supplement (doi:10.1039/c6ta10591b), 2017-01-01
Supplement: c6ta10591b1.pdf [file c6ta10591b1.pdf]

## Supporting Information

### **Microwave-assisted synthesis of shell-core structural CoO@Co coupled with N-doped reduced graphene oxide as superior multifunctional electrocatalysts for Hydrogen Evolution, Oxygen Reduction and Oxygen Evolution Reaction**

X. X. Liu,<sup>ab</sup> J. B. Zang,<sup>a</sup> L. Chen,<sup>b</sup> L. B. Chen,<sup>a</sup> X. Chen,<sup>a</sup> P. Wu,<sup>a</sup> S. Y. Zhou<sup>a</sup> and Y. H.

Wang<sup>a\*</sup>

<sup>a</sup> State Key Laboratory of Metastable Materials Science and Technology, College of Materials Science and Engineering, Yanshan University, Qinhuangdao 066004, PR China

<sup>b</sup> Department of Physics, Hebei Normal University of Science and Technology, Qinhuangdao 066004, PR China

---

\* Corresponding author. Tel: +86 335 8387679.

E-mail: [diamond\\_wangyanhui@163.com](mailto:diamond_wangyanhui@163.com) (Yanhui Wang).

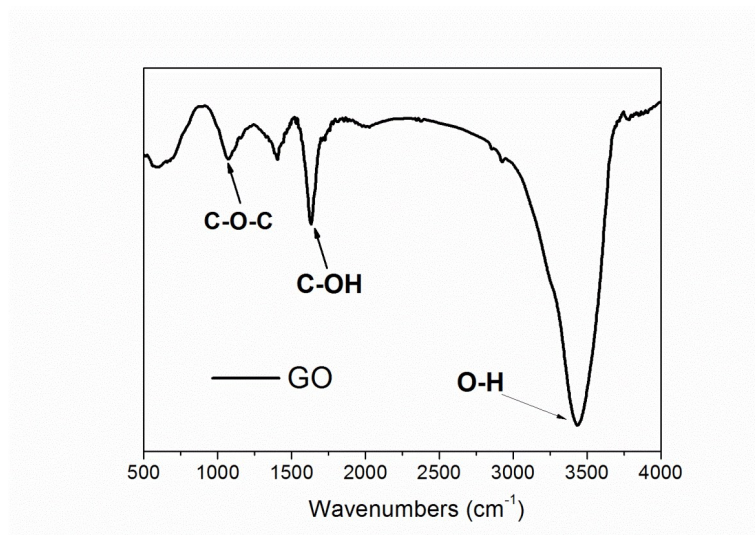

**Figure S1.** FTIR spectra of GO

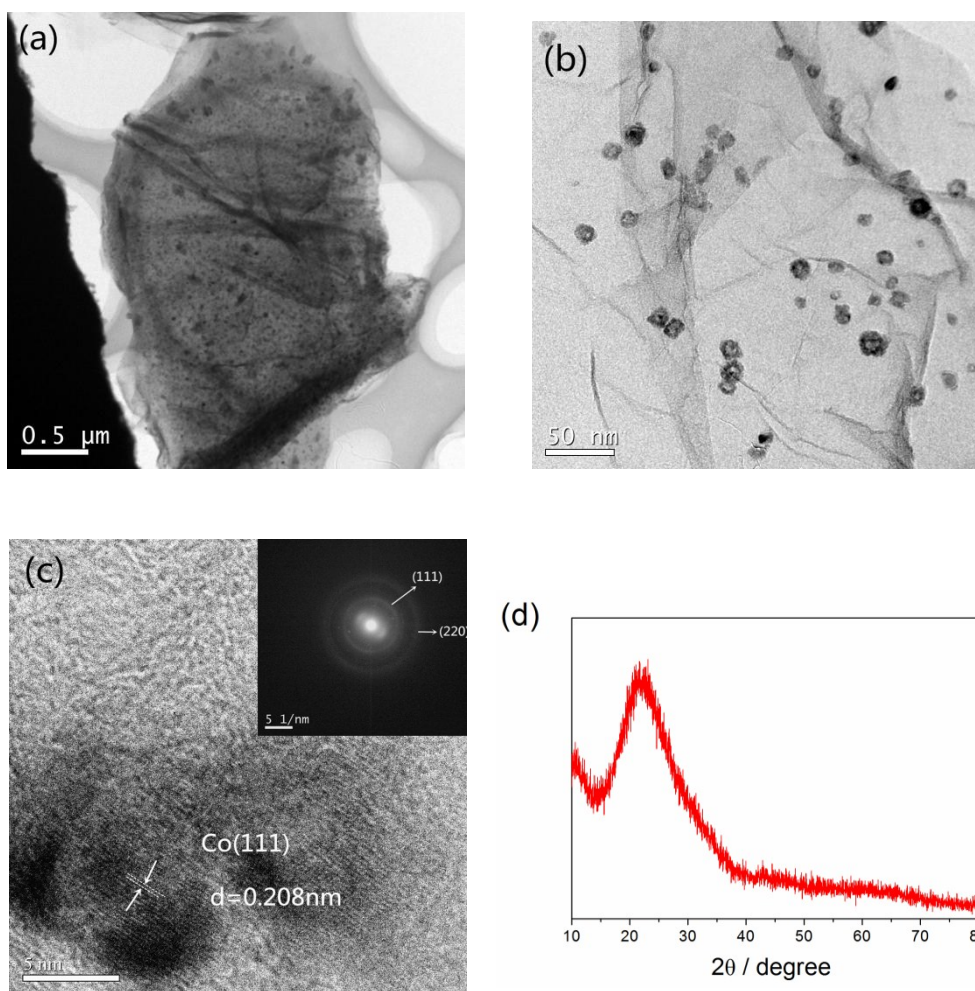

**Figure S2.** TEM images (a) and (b) of the intermediate products (Co/GO) with different magnifications. (c) HRTEM images of an individual Co/GO nanoparticle with the inset showing the corresponding SADE images. (d) XRD patterns of Co/GO.

Figure S2a-b shows a typical TEM image of Co/GO, the formed Co-related nanoparticles with the size of more than a dozen nanometers have been well-dispersed on the oxidized graphene (GO) through a rapid microwave-polyol method. GO containing abundant oxygen-containing functional groups probably provides efficient anchoring points for the nucleation of Co cluster. A high-resolution TEM (HRTEM) image indicates that the observed lattice fringes spacing of 0.208 nm matches well with the (111) planes of Co (Figure S2c). The corresponding selected area electronic diffraction (SAED) investigations further verify the dark particle being Co nanoparticles. But, we only observed the diffraction peak of GO in the XRD patterns of Co/GO composite (Figure S2d). No obvious diffraction peak of Co has been found in the XRD patterns, which probably attributes to that most of the Co particles in the intermediate products (Co/GO) have smaller size and bad crystalline structure before thermal treatment.

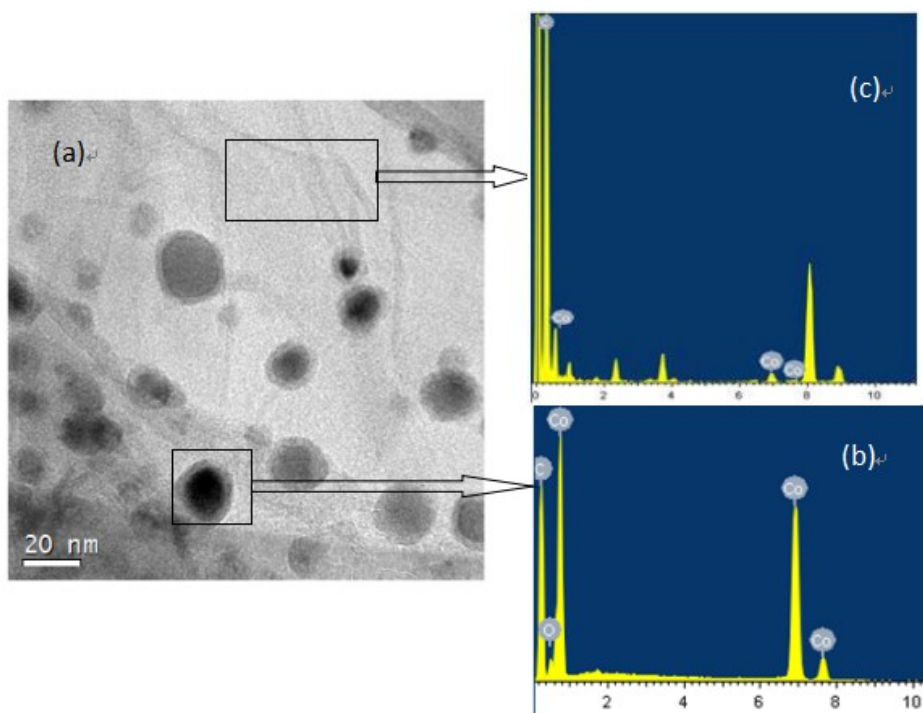

**Figure S3.** (a) TEM image of CoO@Co/N-rGO. EDX analysis on the areas with (b) and without (c) large particles.

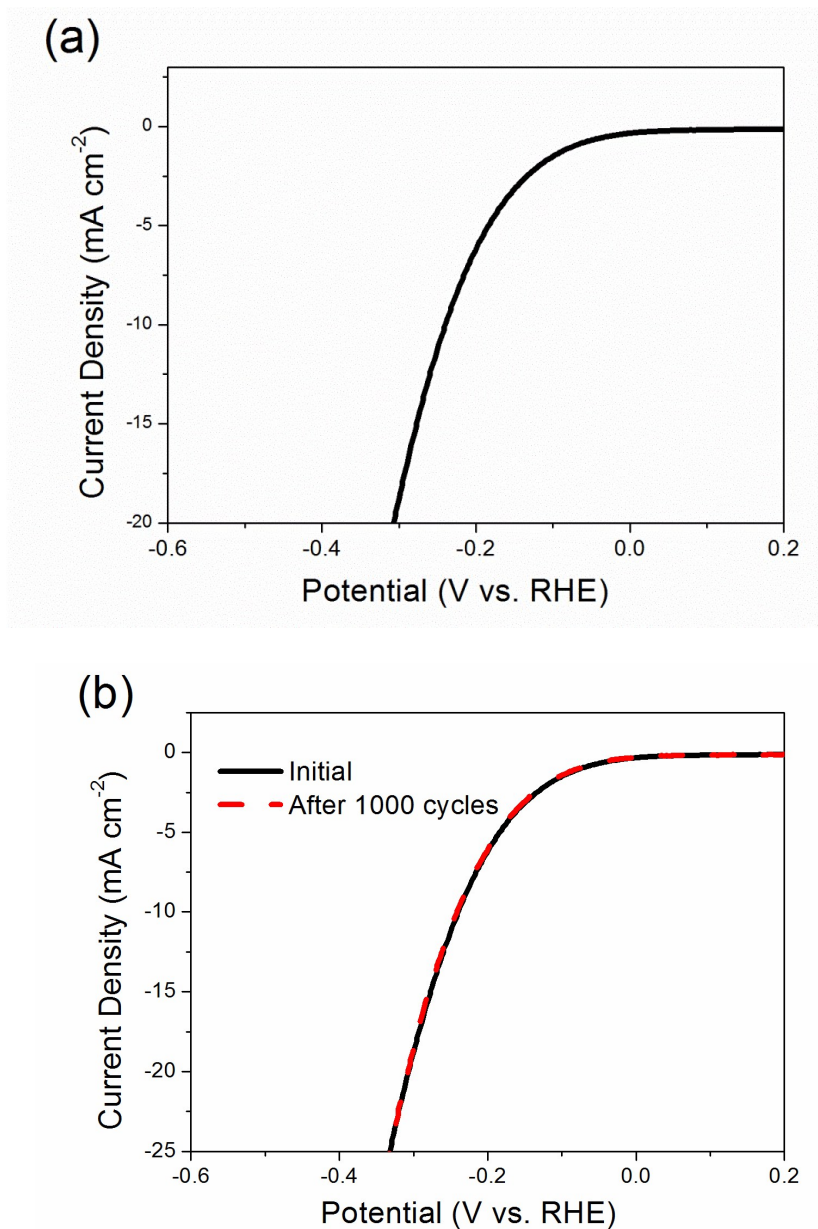

**Figure S4.** (a) Polarization curves of the CoO@Co/N-rGO at 5 mV s<sup>-1</sup> in N<sub>2</sub>-saturated 0.1 M KOH solution (rotation speed 1600rpm). (b) Durability test for the CoO@Co/N-rGO (V) by CV scanning at 1000th cycles in N<sub>2</sub>-saturated 0.1 M KOH solution.

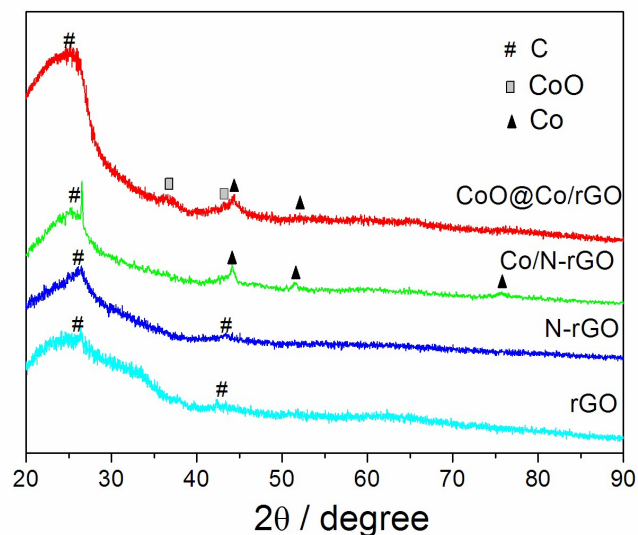

**Figure S5.** XRD patterns of rGO, N-rGO, Co/N-rGO and CoO@Co/rGO

As can be seen from all the XRD results (Figure S5), the broad diffraction peak at  $25.5 \pm 0.5^\circ$  suggests the GO has been reduced into the graphene. The diffraction peaks at  $44.2^\circ$ ,  $51.5^\circ$ ,  $75.8^\circ$  which present in the CoO@Co/rGO and Co/N-rGO correspond to (111), (200), (220) crystal facets of metallic Co with a face-centered cubic (fcc) crystal structure. And the peaks at  $36.5^\circ$ ,  $42.4^\circ$  which present in the CoO@Co/rGO match well with the planes of CoO at (111), (200) respectively. The XRD results indicate the existence of Co and CoO in our samples.

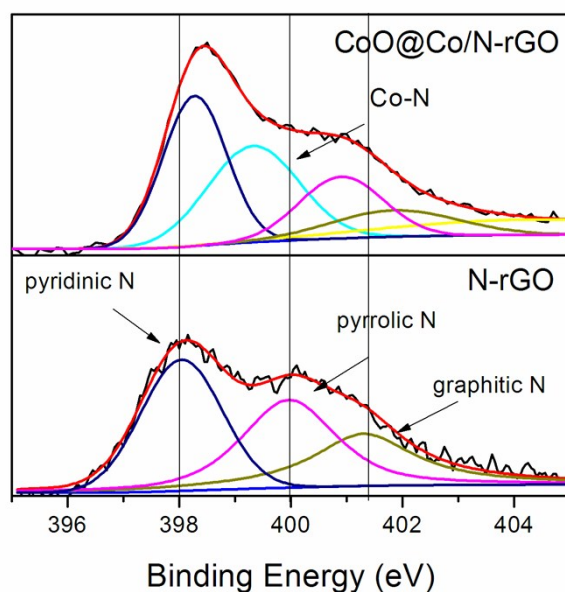

**Figure S6.** High-resolution XPS spectra of N 1s for CoO@Co/N-rGO and N-rGO

The N 1s XPS spectra of CoO@Co/N-rGO sample and N-rGO without Co sample were prepared for comparison in Figure S6. Three types of nitrogen coordination can be attributed to the presence of N atoms in both two samples, which respectively are pyridinic-N, pyrrolic-N and graphitic-N. From these spectra, one could observe that the binding energy of N 1s peak on CoO@Co/N-rGO shifts to higher direction compared with that on N-rGO.

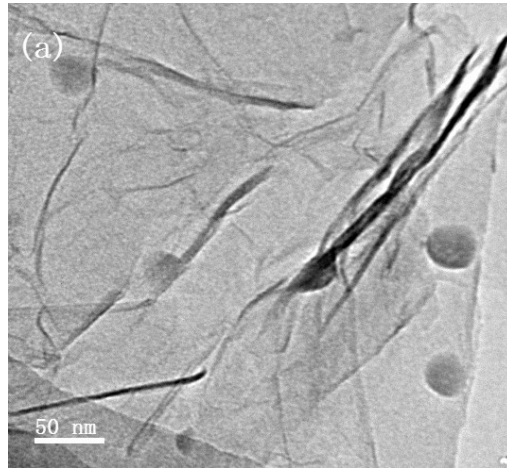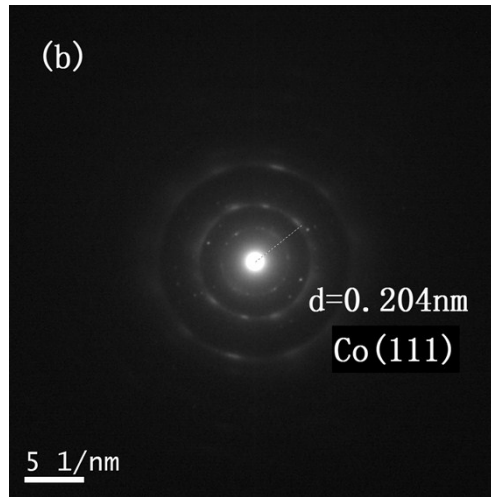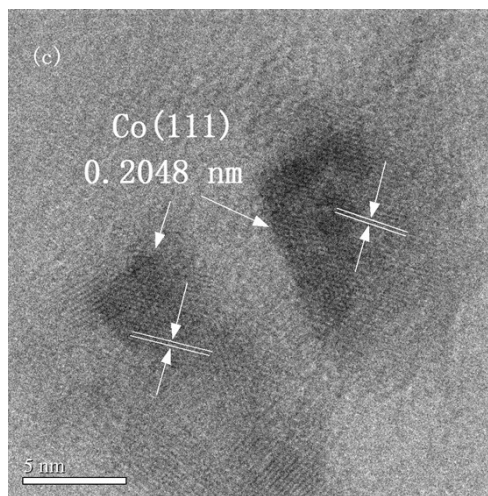



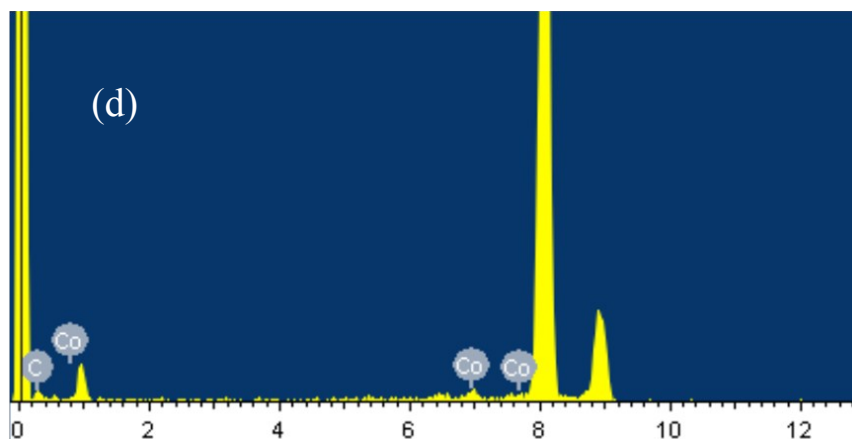

**Figure S7.** (a) TEM images of Co/N-rGO. (b) The corresponding SADE images of Co/N-rGO. (c) HRTEM images of an individual Co nanoparticle in Co/N-rGO. (d) EDX analysis on the areas with Co nanoparticle of Co/N-rGO.

Figure S7a shows a typical TEM image of Co/N-rGO, the formed Co-related nanoparticles are uniformly dispersed on the graphene. The corresponding selected area electronic diffraction (SAED) and the high-resolution TEM (HRTEM) image investigations verified the dark particles attached on the graphene being Co nanoparticles (Figure S7b-c). In addition, the energy dispersive X-ray spectroscopy (EDX) analysis of the nanoparticles shows only cobalt signal without oxygen which further verified that the Co nanoparticles have not been oxidized.

**Table S1.** Comparison of the HER performance of different catalysts.

| Author                       | Catalyst                           | Current density (J)    | Over potential at the corresponding J | Electrolyte                          |
|------------------------------|------------------------------------|------------------------|---------------------------------------|--------------------------------------|
| This work                    | CoO@Co/N-rGO                       | 10 mA cm <sup>-2</sup> | 146 mV                                | 0.5 M H <sub>2</sub> SO <sub>4</sub> |
| This work                    | CoO@Co/N-rGO                       | 10 mA cm <sup>-2</sup> | 237 mV                                | 0.1M KOH                             |
| Yang Hou <sup>1</sup>        | N/Co-doped PCP//NRGO               | 10 mA cm <sup>-2</sup> | 229 mV                                | 0.5 M H <sub>2</sub> SO <sub>4</sub> |
| X. Zou <sup>2</sup>          | Co-NRCNTs                          | 10 mA cm <sup>-2</sup> | 260 mV                                | 0.5 M H <sub>2</sub> SO <sub>4</sub> |
| J. Deng <sup>3</sup>         | FeCo@NCNTs                         | 10 mA cm <sup>-2</sup> | 320 mV                                | 1.0 M H <sub>2</sub> SO <sub>4</sub> |
| D. Merki <sup>4</sup>        | Amorphous MoS <sub>x</sub>         | 10 mA cm <sup>-2</sup> | 540 mV                                | 0.5 M H <sub>2</sub> SO <sub>4</sub> |
| M. Ledendecker <sup>5</sup>  | MnNi                               | 10 mA cm <sup>-2</sup> | 360 mV                                | 0.5 M H <sub>2</sub> SO <sub>4</sub> |
| T. F. Jaramillo <sup>6</sup> | Double-gyroid MoS <sub>2</sub>     | 10 mA cm <sup>-2</sup> | 270 mV                                | 0.5 M H <sub>2</sub> SO <sub>4</sub> |
| Z. B. Chen <sup>7</sup>      | MoO <sub>3</sub> -MoS <sub>2</sub> | 10 mA cm <sup>-2</sup> | 275 mV                                | 1.0 M H <sub>2</sub> SO <sub>4</sub> |
| D. Voiry <sup>8</sup>        | WS <sub>2</sub> nanosheets         | 10 mA cm <sup>-2</sup> | 230 mV                                | 0.5 M H <sub>2</sub> SO <sub>4</sub> |
| Y. Zheng <sup>9</sup>        | N,P-graphene                       | 10 mA cm <sup>-2</sup> | 422 mV                                | 0.5 M H <sub>2</sub> SO <sub>4</sub> |
| M. Gong <sup>10</sup>        | NiO/CNT                            | 20 mA cm <sup>-2</sup> | 490 mV                                | 0.1M KOH                             |
| B. F. Cao <sup>11</sup>      | Ni <sub>2</sub> P                  | 20 mA cm <sup>-2</sup> | 250 mV                                | 0.1M KOH                             |
| R. Subbaraman <sup>12</sup>  | δ-MoN                              | 10 mA cm <sup>-2</sup> | 400 mV                                | 0.1M KOH                             |
| M. A. McArthur <sup>13</sup> | Ni/MWCNT                           | 10 mA cm <sup>-2</sup> | 350 mV                                | 1M KOH                               |
| H. Vrubel <sup>14</sup>      | Co-NRCNTs                          | 10 mA cm <sup>-2</sup> | 370 mV                                | 0.1M KOH                             |

**Table S2.** Comparison of the ORR performance of different catalysts.

| Author                    | Catalyst                                                               | Half wave Potential (V) | Onset potential (V) | Number of electron transfer (n) | Electrolyte |
|---------------------------|------------------------------------------------------------------------|-------------------------|---------------------|---------------------------------|-------------|
| this work                 | CoO@Co/N-rGO                                                           | 0.81                    | 0.95                | 3.97~4.0                        | 0.1 M KOH   |
| Y. Hou <sup>1</sup>       | N/Co-doped PCP//NRGO                                                   | 0.86                    | 0.97                | 3.90~3.94                       | 0.1 M KOH   |
| D. K. Huang <sup>15</sup> | Cobalt oxide@cobalt/N-C                                                | 0.82                    | 0.97                | about 4                         | 0.1 M KOH   |
| X. Liu <sup>16</sup>      | Co-CoO/N-rGO                                                           | 0.78                    | 0.88                | 3.7~3.9                         | 0.1 M KOH   |
| Z. Y. Liu <sup>17</sup>   | N-doped nanoporous carbon                                              | 0.73                    | 0.82                | 3.23 at 0.3 V                   | 0.1 M KOH   |
| Y. Liang <sup>18</sup>    | Co <sub>3</sub> O <sub>4</sub> -N-rmGO                                 | 0.83                    | -                   | 4.0                             | 0.1 M KOH   |
| Y. Hu <sup>19</sup>       | Fe <sub>3</sub> C/C-800                                                | 0.83                    | 1.05                | 3.8~4.0                         | 0.1 M KOH   |
| L. Lin <sup>20</sup>      | Fe-N/C-800                                                             | 0.81                    | 0.92                | 3.96                            | 0.1 M KOH   |
| J. Ryu <sup>21</sup>      | C@Co-P/C                                                               | 0.80                    | 0.87                | -                               | 0.1 M KOH   |
| R. Huo <sup>22</sup>      | Co/CoO/CoFe <sub>2</sub> O <sub>4</sub> /G                             | 0.69                    | 0.77                | 3.70~3.84                       | 0.1 M KOH   |
| B. Cao <sup>23</sup>      | Co <sub>0.50</sub> Mo <sub>0.50</sub> O <sub>y</sub> N <sub>z</sub> /C | 0.76                    | 0.92                | 3.85~3.9                        | 0.1 M KOH   |
| H. Dai <sup>24</sup>      | CoO/NCNT                                                               | -                       | 0.93                | 3.9                             | 1 M KOH     |
| S. Mao <sup>25</sup>      | N-CG-CoO                                                               | 0.81                    | 0.9                 | 4.0                             | 1 M KOH     |

**Table S3.** Comparison of the OER performance of different catalysts.

| Author                   | Catalyst                                          | Current density (J)          | Over potential at the corresponding J | Electrolyte      |
|--------------------------|---------------------------------------------------|------------------------------|---------------------------------------|------------------|
| <b>This work</b>         | <b>CoO@Co/N-rGO</b>                               | <b>10 mA cm<sup>-2</sup></b> | <b>165mV</b>                          | <b>0.1 M KOH</b> |
| Y. Hou <sup>1</sup>      | N/Co-doped PCP//NRGO                              | 10 mA cm <sup>-2</sup>       | 166 mV                                | 0.1 M KOH        |
| X. Liu <sup>16</sup>     | Co-CoO/N-rGO/Ni foam                              | 10 mA cm <sup>-2</sup>       | 163mV                                 | 0.1M KOH         |
| S. Q. Ci <sup>26</sup>   | crumpled graphene/CoO                             | 10 mA cm <sup>-2</sup>       | 165mV                                 | 0.1M KOH         |
| J. Masa <sup>27</sup>    | Co <sub>x</sub> O <sub>y</sub> /NC                | 10 mA cm <sup>-2</sup>       | 166 mV                                | 0.1M KOH         |
| J. Masa <sup>27</sup>    | Mn <sub>x</sub> O <sub>y</sub> /NC                | 10 mA cm <sup>-2</sup>       | 168 mV                                | 0.1M KOH         |
| Y. Lee <sup>28</sup>     | IrO <sub>2</sub>                                  | 10 mA cm <sup>-2</sup>       | 168mV                                 | 0.1M KOH         |
| M. R. Gao <sup>29</sup>  | Mn <sub>3</sub> O <sub>4</sub> /CoSe <sub>2</sub> | 10 mA cm <sup>-2</sup>       | 168 mV                                | 0.1M KOH         |
| Y. T. Meng <sup>30</sup> | α-MnO <sub>2</sub> -SF                            | 10 mA cm <sup>-2</sup>       | 172 mV                                | 0.1M KOH         |
| Y. Gorlin <sup>31</sup>  | CaMn <sub>4</sub> O <sub>x</sub>                  | 10 mA cm <sup>-2</sup>       | 177 mV                                | 0.1M KOH         |

**Table S4.** Comparison of the bifunctional oxygen electrode activities of different catalysts.

| Author                     | Catalyst                                                            | $E_{\text{ORR}}$ (V) at<br>$J = -3 \text{ mA cm}^{-2}$ | $E_{\text{OER}}$ (V) at<br>$J = 10 \text{ mA cm}^{-2}$ | Oxygen<br>Electrode $\Delta E$<br>(V) = $E_{\text{OER}} - E_{\text{ORR}}$ |
|----------------------------|---------------------------------------------------------------------|--------------------------------------------------------|--------------------------------------------------------|---------------------------------------------------------------------------|
| <b>This work</b>           | <b>CoO@Co/N-rGO</b>                                                 | <b>0.73</b>                                            | <b>1.64</b>                                            | <b>0.91</b>                                                               |
| Y. Gorlin <sup>32</sup>    | 20 wt% Ir/C                                                         | 0.69                                                   | 1.61                                                   | 0.92                                                                      |
| Y. Gorlin <sup>32</sup>    | 20 wt% Ru/C                                                         | 0.61                                                   | 1.62                                                   | 1.01                                                                      |
| Y. Gorlin <sup>32</sup>    | 20 wt% Pt/C<br>Mn-oxide                                             | 0.86                                                   | 2.02                                                   | 1.16                                                                      |
| Y. Gorlin <sup>32</sup>    | Mn-oxide                                                            | 0.73                                                   | 1.77                                                   | 1.04                                                                      |
| W. G. Hardin <sup>33</sup> | LaNiO <sub>3</sub> /NC                                              | 0.64                                                   | 1.66                                                   | 1.02                                                                      |
| Q. Liu <sup>34</sup>       | NiCo <sub>2</sub> S <sub>4</sub> @N/S-rGO                           | 0.76                                                   | 1.70                                                   | 0.94                                                                      |
| D. Wang <sup>35</sup>      | Co <sub>3</sub> O <sub>4</sub> /2.7Co <sub>2</sub> MnO <sub>4</sub> | 0.68                                                   | 1.77                                                   | 1.09                                                                      |
| D. U. Lee <sup>36</sup>    | NiCo <sub>2</sub> O <sub>4</sub> /G                                 | 0.54                                                   | 1.67                                                   | 1.13                                                                      |
| C. Jin <sup>37</sup>       | NiCo <sub>2</sub> O <sub>4</sub>                                    | 0.75                                                   | 1.72                                                   | 0.97                                                                      |

1. Y. Hou, Z. H. Wen, S. M. Cui, S. Q. Ci, S. Mao and J. H. Chen, *Advanced Functional Materials*, 2015, **25**, 872-882.
2. X. Zou, X. Huang, A. Goswami, R. Silva, B. R. Sathe, E. Mikmeková and T. Asefa, *Angewandte Chemie*, 2014, **126**, 4461-4465.
3. J. Deng, P. J. Ren, D. H. Deng, L. Yu, F. Yang and X. H. Bao, *Energy & Environmental Science*, 2014, **7**, 1919-1923.
4. D. Merki, S. Fierro, H. Vrubel and X. L. Hu, *Chemical Science*, 2011, **2**, 1262-1267.
5. M. Ledendecker, G. Clavel, M. Antonietti and M. Shalom, *Advanced Functional Materials*, 2015, **25**, 393-399.
6. T. F. Jaramillo, K. P. Jorgensen, J. Bonde, J. H. Nielsen, S. Horch and I. Chorkendorff, *Science*, 2007, **317**, 100-102.
7. Z. B. Chen, D. Cummins, B. N. Reinecke, E. Clark, M. K. Sunkara and T. F. Jaramillo, *Nano Letters*, 2011, **11**, 4168-4175.
8. D. Voiry, H. Yamaguchi, J. W. Li, R. Silva, D. C. B. Alves, T. Fujita, M. W. Chen, T. Asefa, V. B. Shenoy, G. Eda and M. Chhowalla, *Nature Materials*, 2013, **12**, 850-855.

9. Y. Zheng, Y. Jiao, L. H. Li, T. Xing, Y. Chen, M. Jaroniec and S. Z. Qiao, *Acs Nano*, 2014, **8**, 5290-5296.
10. M. Gong, W. Zhou, M. C. Tsai, J. G. Zhou, M. Y. Guan, M. C. Lin, B. Zhang, Y. F. Hu, D. Y. Wang, J. Yang, S. J. Pennycook, B. J. Hwang and H. J. Dai, *Nature Communications*, 2014, **5**.
11. B. F. Cao, G. M. Veith, J. C. Neufeind, R. R. Adzic and P. G. Khalifah, *Journal of the American Chemical Society*, 2013, **135**, 19186-19192.
12. R. Subbaraman, D. Tripkovic, K. C. Chang, D. Strmcnik, A. P. Paulikas, P. Hirunsit, M. Chan, J. Greeley, V. Stamenkovic and N. M. Markovic, *Nature Materials*, 2012, **11**, 550-557.
13. M. A. McArthur, L. Jorge, S. Coulombe and S. Omanovic, *Journal of Power Sources*, 2014, **266**, 365-373.
14. H. Vrubel and X. L. Hu, *Angewandte Chemie-International Edition*, 2012, **51**, 12703-12706.
15. D. K. Huang, Y. P. Luo, S. H. Li, B. Y. Zhang, Y. Shen and M. K. Wang, *Nano Research*, 2014, **7**, 1054-1064.
16. X. Liu, W. Liu, M. Ko, M. Park, M. G. Kim, P. Oh, S. Chae, S. Park, A. Casimir, G. Wu and J. Cho, *Advanced Functional Materials*, 2015, **25**, 5799-5808.
17. Z. Y. Liu, G. X. Zhang, Z. Y. Lu, X. Y. Jin, Z. Chang and X. M. Sun, *Nano Research*, 2013, **6**, 293-301.
18. Y. Liang, Y. Li, H. Wang, J. Zhou, J. Wang, T. Regier and H. Dai, *Nat Mater*, 2011, **10**, 780-786.
19. Y. Hu, J. O. Jensen, W. Zhang, L. N. Cleemann, W. Xing, N. J. Bjerrum and Q. Li, *Angew Chem Int Ed Engl*, 2014, **53**, 3675-3679.
20. L. Lin, Q. Zhu and A. W. Xu, *J Am Chem Soc*, 2014, **136**, 11027-11033.
21. J. Ryu, N. Jung, D. H. Lim, D. Y. Shin, S. H. Park, H. C. Ham, J. H. Jang, H. J. Kim and S. J. Yoo, *Chemical communications*, 2014, **50**, 15940-15943.
22. R. Huo, W. J. Jiang, S. Xu, F. Zhang and J. S. Hu, *Nanoscale*, 2014, **6**, 203-206.
23. B. Cao, G. M. Veith, R. E. Diaz, J. Liu, E. A. Stach, R. R. Adzic and P. G. Khalifah, *Angew Chem Int Ed Engl*, 2013, **52**, 10753-10757.
24. Y. Y. Liang, H. L. Wang, P. Diao, W. Chang, G. S. Hong, Y. G. Li, M. Gong, L. M. Xie, J. G. Zhou, J. Wang, T. Z. Regier, F. Wei and H. J. Dai, *Journal of the American Chemical Society*, 2012, **134**, 15849-15857.
25. S. Mao, Z. Wen, T. Huang, Y. Hou and J. Chen, *Energy Environ. Sci.*, 2014, **7**, 609-616.
26. S. Q. Ci, S. Mao, T. Z. Huang, Z. H. Wen, D. A. Steeber and J. H. Chen, *Electroanalysis*, 2014, **26**, 1326-1334.
27. J. Masa, W. Xia, I. Sinev, A. Q. Zhao, Z. Y. Sun, S. Grutzke, P. Weide, M. Muhler and W. Schuhmann, *Angewandte Chemie-International Edition*, 2014, **53**, 8508-8512.
28. Y. Lee, J. Suntivich, K. J. May, E. E. Perry and Y. Shao-Horn, *Journal of Physical Chemistry Letters*, 2012, **3**, 399-404.
29. M. R. Gao, Y. F. Xu, J. Jiang, Y. R. Zheng and S. H. Yu, *Journal of the American Chemical Society*, 2013, **135**, 6378-6378.
30. Y. T. Meng, W. Q. Song, H. Huang, Z. Ren, S. Y. Chen and S. L. Suib, *Journal of the American Chemical Society*, 2014, **136**, 11452-11464.
31. Y. Gorlin, B. Lassalle-Kaiser, J. D. Benck, S. Gul, S. M. Webb, V. K. Yachandra, J. Yano and T. F. Jaramillo, *Journal of the American Chemical Society*, 2013, **135**, 8525-8534.

32. Y. Gorlin and T. F. Jaramillo, *Journal of the American Chemical Society*, 2010, **132**, 13612-13614.
33. W. G. Hardin, D. A. Slanac, X. Wang, S. Dai, K. P. Johnston and K. J. Stevenson, *Journal of Physical Chemistry Letters*, 2013, **4**, 1254-1259.
34. Q. Liu, J. T. Jin and J. Y. Zhang, *Acs Applied Materials & Interfaces*, 2013, **5**, 5002-5008.
35. D. D. Wang, X. Chen, D. G. Evans and W. S. Yang, *Nanoscale*, 2013, **5**, 5312-5315.
36. D. U. Lee, B. J. Kim and Z. W. Chen, *Journal of Materials Chemistry A*, 2013, **1**, 4754-4762.
37. C. Jin, F. L. Lu, X. C. Cao, Z. R. Yang and R. Z. Yang, *Journal of Materials Chemistry A*, 2013, **1**, 12170-12177.
